# Supplementary material for: Prognostic and immunological value of ATP6AP1 in breast cancer: implications for SARS-CoV-2
Source: publisher site journal article supplement (doi:10.18632/aging.203229), 2021-07-06
Supplement: Supplementary file [file aging-v13i13-203229-supplementary-material-SD1.pdf]

**SUPPLEMENTARY FIGURES**

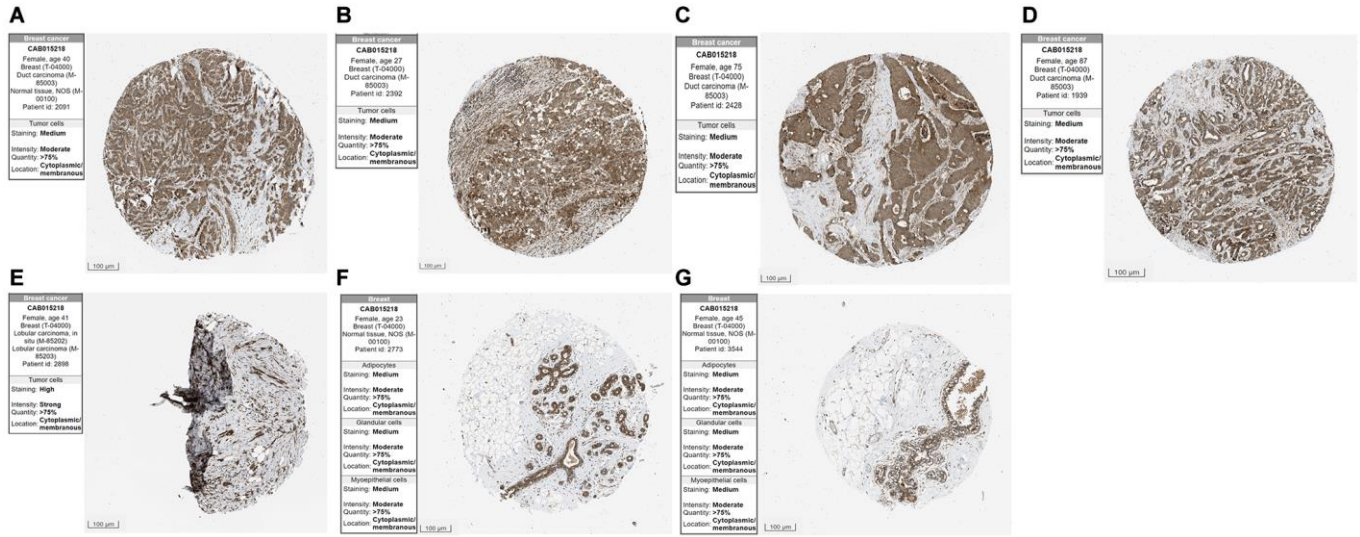

**Supplementary Figure 1.** ATP6AP1 protein levels in normal (A–E) and cancerous breast tissues (F, G) based on immunohistochemistry data from the HPA database (antibody: CAB015218, provided by Origene. Dilution: 1:30).

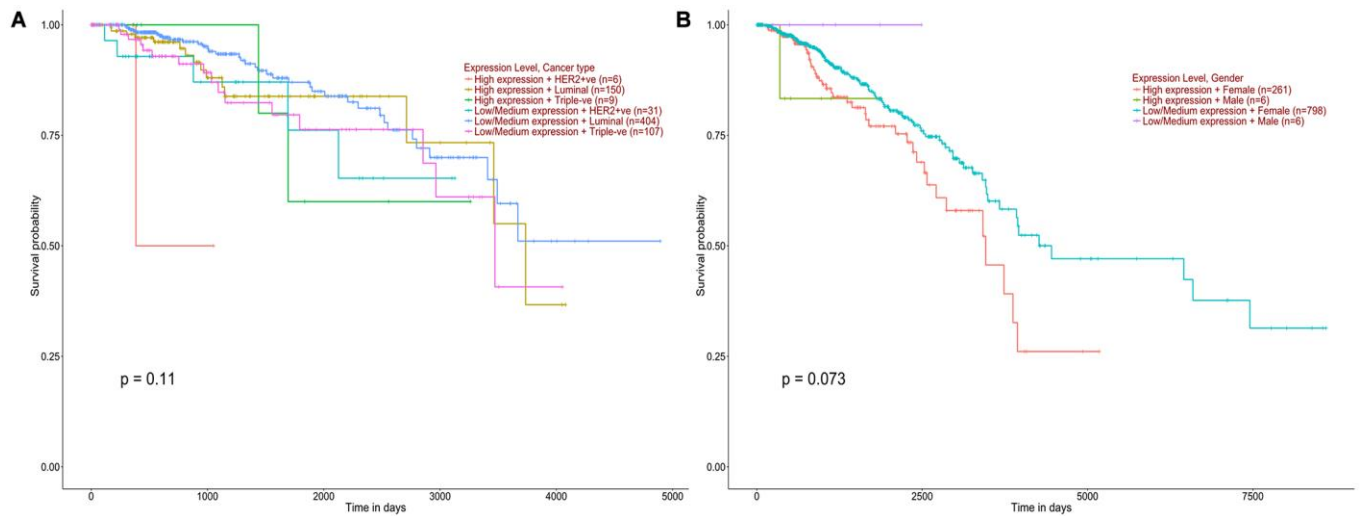

**Supplementary Figure 2.** The survival analysis of ATP6AP1 expression based on subtype (A) and gender (B) of BC.

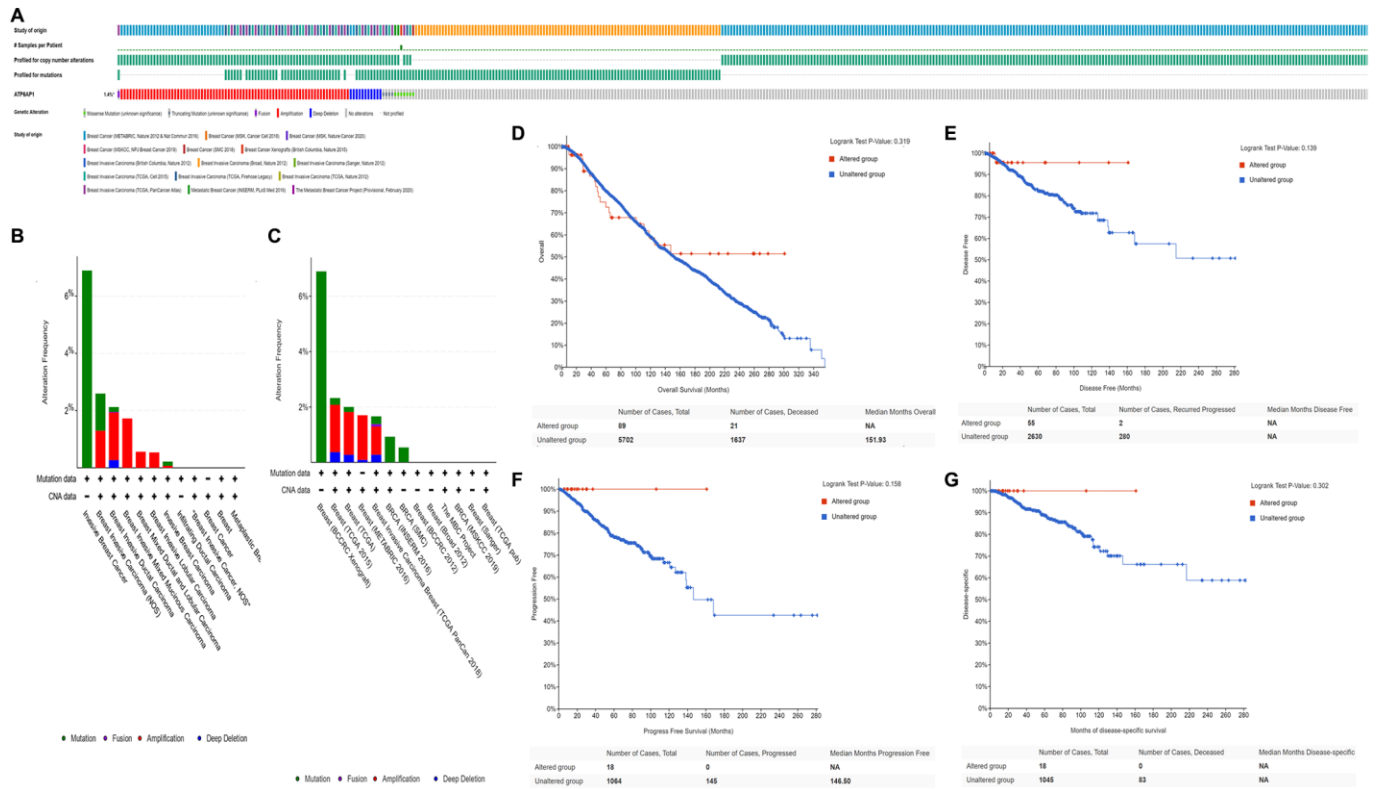

**Supplementary Figure 3. The mutation analysis of ATP6AP1 in BC.** (A) The genetic alternation condition of ATP6AP1 in BC ( $n = 7274$ ). (B, C) The summary of alternation frequency based on different datasets and cancer types in BC ( $n = 7274$ ). (D–G) The prognosis of ATP6AP1 based on its alternation condition.
